1 **COVID-19 vaccine hesitancy and refusal and associated factors in an adult**  
2 **population in Saskatchewan, Canada: Evidence from predictive modelling**

3  
4 *Short title: COVID-19 vaccine hesitancy and refusal in Saskatchewan*

5  
6 Nazeem Muhajarine (ORCID: 0000-0001-6781-5421)<sup>1,2</sup>, Daniel A. Adeyinka (ORCID: 0000-0003-1855-  
7 6878)<sup>1,2</sup>, Jessica McCutcheon<sup>3</sup>, Kathryn Green<sup>4</sup>, Miles Fahlman<sup>5</sup>, Natalie Kallio<sup>1,2</sup>

8  
9 <sup>1</sup>Department of Community Health and Epidemiology, College of Medicine, University of Saskatchewan,  
10 Saskatoon, Canada

11 <sup>2</sup>Saskatchewan Population Health and Evaluation Research Unit, Saskatchewan, Canada

12 <sup>3</sup>Canadian Hub for Applied and Social Research, University of Saskatchewan, Saskatoon, Canada

13 <sup>4</sup>Department of Community Health and Epidemiology (retired), University of Saskatchewan, Saskatoon,  
14 Canada

15 <sup>5</sup>HACAN Consulting Ltd., Saskatoon, Saskatchewan, Canada

16  
17 *Corresponding author: Nazeem Muhajarine nazeem.muhammad@usask.ca*

18

19

20

21

22

23

24

25

26

27

28

29

30

31

32

33

34

35

36

37

38

39

40

41

42

43

44

45

## 46 **Abstract**

47 **Background:** A high population level of vaccination is required to control the COVID-19  
48 pandemic, but not all Canadians are convinced of the value and safety of vaccination.  
49 Understanding more about these individuals can aid in developing strategies to increase their  
50 acceptance of a COVID-19 vaccine. The objectives of this study were to describe COVID-19  
51 vaccine acceptance, hesitancy and refusal rates and associated factors in Saskatchewan, Canada.  
52 **Methods:** This study consisted of a weighted sample of 9,252 survey responses from 7,265  
53 Saskatchewan adults ( $\geq 18$  years) between May 4, 2020 and April 3, 2021. The outcome variable  
54 was vaccine intention: vaccine acceptance, hesitancy, and refusal. The independent variables  
55 were layered into socio-demographic factors, risk of exposure to coronavirus, mitigating  
56 behaviours, and perceptions of COVID-19. Data were analyzed using multinomial logistic  
57 regression and a classification and regression tree.  
58 **Results:** Seventy-six percent of the respondents indicated that they had been or were willing to  
59 be vaccinated, 13% had not yet decided, and the remaining 11% said they would not be  
60 vaccinated. Factors that increased the likelihood of vaccine refusal and hesitancy were lower  
61 education level, financial instability, Indigenous status, and not being concerned about spreading  
62 the coronavirus. Perceiving COVID-19 to be more of a threat to one's community and believing  
63 that one had a higher risk of illness or death from COVID-19 decreased the likelihood of both  
64 vaccine refusal and hesitancy. Women and newcomers to Canada were more likely to be unsure  
65 about getting vaccinated. Respondents who did not plan to be vaccinated were less likely to wear  
66 face masks and practice physical distancing.  
67 **Conclusion:** While many Canadians have voluntarily and eagerly become vaccinated already,  
68 reaching sufficient coverage of the population is likely to require targeted efforts to convince  
69 those who are resistant or unsure. Identifying and overcoming any barriers to vaccination that  
70 exist within the socio-demographic groups we found were least likely to be vaccinated is a  
71 crucial component.

72 *Keywords: Coronavirus; COVID-19; Vaccine; Vaccine hesitancy; Vaccine refusal; Machine*  
73 *learning; Saskatchewan*

74

75

76

77

78

## 79 Introduction

80 Globally, the coronavirus disease 2019 (COVID-19) caused by the novel severe acute respiratory  
81 syndrome coronavirus 2 (SARS-CoV-2) has caused illness and death in more people than any  
82 other pandemic in the last hundred years. As of June 4 2021, nearly 172 million people had been  
83 infected, while 3.7 million had died worldwide.<sup>1</sup> As Canada continues its efforts to bring the  
84 pandemic under control, 1.4 million people have been infected (3,625 per 100,000 population),  
85 with 25,679 (67.5 per 100,000 population) COVID-19 related deaths.<sup>2</sup> Residents of the province  
86 of Saskatchewan are among those disproportionately affected by COVID-19 in Canada.<sup>2</sup> In the  
87 first week of June 2021, Saskatchewan had 110 active cases per 100,000 populations, ranking  
88 third on the Canadian league table.<sup>2</sup> Furthermore, 46 out of 100,000 Saskatchewan residents have  
89 died from COVID-19.<sup>2</sup>

90 Biomedical prevention methods such as vaccinations (when combined with socio-behavioral  
91 measures) have been highly effective in controlling communicable diseases, including the  
92 eradication of smallpox and polio. Successful COVID-19 vaccination campaigns will save  
93 millions of lives and gradually enable communities to reopen and return to some form of their  
94 pre-COVID states. While the exact percentage of the population that must be vaccinated to reach  
95 herd immunity is being debated,<sup>3</sup> estimates have benchmarked 60-80%.<sup>4-6</sup> However, with the  
96 emergence of new strains of SARS-CoV-2, that number may rise to as high as 85-90% of the  
97 population, with some questioning whether it is even possible to achieve herd immunity now.<sup>7,8</sup>  
98 As of May 29, 2021, 56.78% of Canadians had received at least one vaccine dose, while only  
99 5.7% were fully vaccinated.

100 Evidence supporting COVID-19 vaccine safety and cost-effectiveness is mounting,<sup>9,10</sup> yet  
101 vaccine hesitancy and refusal continue to pose significant roadblocks to attaining herd-immunity  
102 level coverage. The Strategic Advisory Group of Experts on Immunization (SAGE) defines  
103 vaccine hesitancy as “delay in acceptance or refusal of vaccines despite availability of  
104 services”.<sup>11</sup> In this paper, we use the term “vaccine hesitancy” to describe individuals who were  
105 unsure whether they would be vaccinated and “vaccine refusal” to denote complete rejection of  
106 vaccination. Different intervention approaches will be necessary for these two groups. For  
107 example, social influencers and clear messaging about safety may help clear the doubts and  
108 concerns about vaccination among hesitant groups, whereas stronger incentives or mandates may  
109 be required for who refuse to be vaccinated. For these reasons, there is sustained interest in  
110 understanding the psycho-socio-behavioral factors which impact vaccine hesitancy and refusal.

111 Literature on COVID vaccine intentions remains limited in Canada with other studies focusing  
112 on healthcare workers,<sup>12</sup> or limited to descriptive results<sup>13,14</sup> or qualitative assessment.<sup>15</sup> In a  
113 Canada-wide survey conducted during the vaccine testing and approval stages, 75% of  
114 Canadians expressed willingness to receive a COVID-19 vaccine.<sup>13</sup> The main reasons for  
115 vaccine hesitancy identified by this survey were lack of confidence in vaccine safety (54.2%)  
116 and fear of side-effects (51.7%).<sup>13</sup> Much lower acceptance rates were found in polls conducted  
117 pre-vaccine rollout by the Angus Reid Institute (66%)<sup>16</sup> and BEworks (63%).<sup>17</sup> Patterns of  
118 vaccine hesitancy and refusal have changed after vaccine rollout began in Canada. According to  
119 Angus Reid Institute, there have been declining trends in vaccine hesitancy and refusal—53% of

120 adults reported receipt of first dose of vaccine, while another 29% would like to be vaccinated.<sup>18</sup>  
121 In a qualitative study which examined 3915 tweets from Canadian Twitter users, the major  
122 reasons for vaccine hesitancy were described as safety concerns, conspiracy theories,  
123 misinformation, and doubts about the credibility of pharmaceutical companies.<sup>15</sup>

124 Our study contributes to a fast-moving knowledge base that has been dominated by polling data.  
125 We sought to identify a broad range of factors associated with COVID-19 vaccine  
126 readiness/receipt, hesitancy, or refusal in Saskatchewan, using a mix of probability-based and  
127 convenience sampling. The findings from this study are expected to guide and inform policy  
128 makers, governments, health experts, and media in driving successful COVID-19 immunization  
129 campaigns.

130

## 131 **Materials and methods**

### 132 **Study setting**

133 Saskatchewan is a landlocked province in Western Canada that is bordered on the south by the  
134 United States, west by Alberta, north by Northwest Territories, east by Manitoba, and northeast  
135 by Nunavut. In the first quarter of 2021, Saskatchewan's population was estimated at 1.2 million,  
136 translating to 3.1% of Canadian inhabitants.<sup>19</sup> More than half of Saskatchewan residents live in  
137 the southern prairie, especially the largest city (Saskatoon) and capital city (Regina). The  
138 northern part of the province is sparsely populated. Currently, Saskatchewan accounts for 13.3%  
139 of the Indigenous population in Canada.<sup>20</sup>

140

### 141 **Study sample and design**

142 This prospective panel study included 9,252 responses collected from 7,265 Saskatchewan adults  
143 (18 years and older) between May 4, 2020 and April 3, 2021 in the Social Contours and COVID-  
144 19 Project. The purpose of the parent study is, briefly: 1) Collect behavioural, perceptual, social,  
145 and place-based data (i.e., how we act, think, interact, and move); 2) Assign a COVID-19 risk  
146 level to people and places, over time; 3) Identify lower- and higher-risk regions in the province  
147 of Saskatchewan; and 4) Communicate this information to public health officials and the general  
148 public. The hybrid sample included participants from an online panel of Saskatchewan adults  
149 (the Community Panel), originally enrolled through a probability sampling of landlines and  
150 mobile lines accessed through random digit dialing (RDD) and volunteer participants recruited  
151 monthly via an online survey platform, managed by the Canadian Hub of Applied and Social  
152 Research at the University of Saskatchewan in Saskatoon. The sample was estimated to achieve  
153 a  $\pm 3.1\%$  margin of error. To ensure data representativeness, samples were weighted by age,  
154 gender, and location of residence within Saskatchewan using 2016 Canadian Census data.

155

### 156 **Ethics**

157 The study protocol was reviewed and approved by the University of Saskatchewan Ethics Board  
158 (Beh-1971). The Social Contours study was conducted in accordance with the 2018 Tri-Council  
159 Policy Statement for the Ethical Conduct for the Research involving Humans (article 2.5).

160

161 **Variables**

162 The outcome of interest was COVID-19 vaccine intention. Respondents who had already been  
 163 vaccinated or intended to be vaccinated were termed “vaccine ready” and constitute the reference  
 164 category. Those who said they “didn’t know yet” whether they would get vaccinated were  
 165 categorized as “vaccine hesitant” and those who indicated they would not get vaccinated were  
 166 referred to as “refused vaccine.”

167 Based on a priori importance to the outcome variable and evidence from the literature and  
 168 theoretical focus of this study, we included a large number of independent variables, of the  
 169 following types: socio-demographic factors, risk of exposure to SARS-CoV-2, mitigating  
 170 behaviours, and perceptions of COVID-19. Table 1 lists all the variables entered into the model.

171

172 Table 1. Independent variables included in statistical analyses.

| Category                   | Variables                                                                                                                                                                                                                                                                                                                                                                                                                                                                                                                                                                                                                                                                                                                                                                                                                                                                                       |
|----------------------------|-------------------------------------------------------------------------------------------------------------------------------------------------------------------------------------------------------------------------------------------------------------------------------------------------------------------------------------------------------------------------------------------------------------------------------------------------------------------------------------------------------------------------------------------------------------------------------------------------------------------------------------------------------------------------------------------------------------------------------------------------------------------------------------------------------------------------------------------------------------------------------------------------|
| <b>Socio-demographic</b>   | <p><b>Age</b> (year born; then grouped &lt;=49, 50-64, &gt;=65yrs)<br/> <b>Gender</b> (men, women)<br/> <b>Employment status</b> (grouped: employed, unemployed/retired)<br/> <b>Educational level</b> (advanced/professional degree, completed diploma/certificate or bachelor’s degree, some college or university, no formal/some/completed secondary)<br/> <b>Perceived financial security</b> (grouped: secure, not secure)<br/> <b>Place of residence</b> (6-digit postal code; then grouped: rural, mid-sized town/city, large cities)<br/> <b>Immigration status</b> (born in Canada, born outside Canada, here &gt;=20 years, born outside Canada, here &lt;20 years)<br/> <b>Indigenous status</b> (North American Indigenous, non-indigenous)<br/> <b>Household composition</b> (live alone, live with only adults, live with only children, live with both adults and children)</p> |
| <b>Exposure risk level</b> | <p><b>Risk level of places visited during preceding week</b> (grouped into low, moderate, high based on high circulation, closed places, e.g., bars, restaurants, fitness centres)<br/> <b>Number of close contacts</b> (with people not in household, unmasked, not distancing) x duration of contact<br/> <b>Perceived risk of exposure at work</b> (grouped into low, moderate, high)<br/> <b>Extent of contact with others while working/volunteering</b> (grouped: low, moderate, high)<br/> <b>Frequency of in-person grocery shopping</b> (grouped: low, moderate, high)<br/> <b>Household density</b> (ratio of residents to bedroom)<br/> <b>Travel outside province since start of pandemic</b> (yes, no)</p>                                                                                                                                                                         |
| <b>Mitigating factors</b>  | <p><b>Frequency of face mask use when inside building other than home</b> (grouped Adhering: all/most/some of the time, Non-adhering: little or never)<br/> <b>Physical distancing when inside building other than home</b> (grouped Adhering: all/most/some of the time, Non-adhering: little or never)<br/> <b>Current health status</b> (self efficacy grouped into poor/fair, moderate, good, very good/excellent)</p>                                                                                                                                                                                                                                                                                                                                                                                                                                                                      |

|                    |                                                                                                                                                                       |
|--------------------|-----------------------------------------------------------------------------------------------------------------------------------------------------------------------|
|                    | <b>Being tested for COVID-19</b> (yes, no)                                                                                                                            |
| <b>Perceptions</b> | <b>Adequacy of provincial government's response to pandemic</b><br>(strongly/somewhat agree, neither agree nor disagree, strongly/somewhat disagree)                  |
|                    | <b>Degree to which others are following public health recommendations</b><br>(strongly/somewhat agree, neither agree nor disagree, strongly/somewhat disagree)        |
|                    | <b>Size of threat posed by COVID-19 to one's community</b> (very small, fairly small; very big, fairly big)                                                           |
|                    | <b>Likelihood of becoming infected in the next week</b> (not at all, somewhat/fairly/very likely)                                                                     |
|                    | <b>Perceived severity of consequences should one become infected</b> (would not get very sick at all, develop mild to moderate disease, get very sick, likely to die) |
|                    | <b>Concern about spreading virus to others if infected</b> (very concerned, somewhat concerned, slightly/hardly concerned at all)                                     |

173

## 174 **Statistical analyses**

175 We modelled the relationship between vaccine intentions, sociodemographic characteristics, risk  
176 exposure behaviours, mitigating factors against COVID-19 and perceptions of the pandemic  
177 using both a conventional statistical approach (i.e., multinomial logistic regression) and  
178 predictive machine learning algorithm (i.e., classification and regression tree (CART), otherwise  
179 known as decision tree). We used the predictive machine learning approach to visually depict the  
180 hierarchical relationships between our outcome of interest and the predictors, and among the  
181 predictors in a multidimensional space. This approach also validates the findings of the  
182 multinomial regression because CART is more robust when dealing with skewed data,  
183 multicollinearity, multilevel interaction, outliers, non-linear distribution, and missing values.<sup>21</sup>  
184 Data quality checks were ensured before modelling.

185 **Multinomial logistic regression:** To assess multicollinearity among the candidate variables, the  
186 mean variance inflation factor (VIF) was computed. With a mean VIF of 1.24, multicollinearity  
187 was not a threat to internal validity. Using a stepwise and backward selection approach, we  
188 initially fitted a full (saturated) multivariate multinomial logistic regression model which  
189 adjusted for the confounding effects of covariables and determined the main effects of the  
190 predictor variables on vaccine intentions. To avoid over- or under-fitting, a p-value of  $\leq 0.2$  was  
191 used to select candidate variables for retention in the parsimonious model. Model performances  
192 were assessed with adjusted R-squared, Akaike information criterion (AIC), Bayesian  
193 information criterion (BIC) and log likelihood. Self-reported level of exposure at work was not  
194 included as a variable, because it was limited to only those working outside their homes; that is,  
195 it excluded those who were working from home or were unemployed. The most parsimonious  
196 model with the lowest predictive errors excluded current work/volunteering situation, level of  
197 exposure at recent places visited, and being tested for SARS-CoV-2. Adjusted relative risk ratios  
198 (aRRR) and 95% confidence intervals (CI) were used to estimate the strength of association. The  
199 statistical significance level of association was set at  $p < 0.05$ , two-tailed. The multinomial  
200 regression model was implemented in Stata<sup>TM</sup> version 16.1.<sup>22</sup>



201 **Classification and Regression Tree:** Given the predictive capacity of machine learning and its  
 202 limited application in population health research,<sup>23</sup> a decision tree analysis was conducted in  
 203 SAS JMP™ version 16.0 (SAS Cary, NC, USA) to complement and validate the multinomial  
 204 regression models.<sup>24</sup> The plurality of methods gives more confidence to the study findings. Using  
 205 all the candidate independent variables (see above, Variables), the growing method for CART  
 206 was a recursive partitioning based on LogWorth statistic (i.e., negative log of adjusted p-value  
 207 for Chi-squared statistic) and G-squared statistic (i.e., likelihood ratio Chi-squared). The  
 208 LogWorth statistic and G-squared statistic were used in splitting the tree at the optimal split  
 209 points. A parsimonious model was fitted with five depths tree, 11 nodes, of which six nodes were  
 210 leaves (i.e., terminal nodes). Out the 9252 responses, 7402 (80%) were randomly assigned to a  
 211 training set and 1850 (20%) to a validation set for the purpose of externally validating the  
 212 decision tree model. The model-fit was assessed with area under the receiver operating  
 213 characteristics (AUROC) curve, lift curve, root average squared error (RASE), and generalized  
 214 R-squared.  
 215

## 216 Results

217 The general characteristics of respondents are shown in Table 2. The average age was 55 years  
 218 (interquartile range (IQR): 42-65 years); 75.74% were women, 92.66% were born in Canada, and  
 219 72.54% had at least a technical diploma or certificate. Overall, 76.13% of the respondents  
 220 reported being vaccinated or willing to get a COVID-19 vaccine, while 13.3% were unsure and  
 221 10.56% refused to be vaccinated.  
 222

223 Table 2. Characteristics of respondents and vaccine intention rates in Saskatchewan, Canada.

| Variables                                          | Overall      | Vaccine Ready | Vaccine hesitant | Refused vaccine |
|----------------------------------------------------|--------------|---------------|------------------|-----------------|
|                                                    | n (%)        | n (%)         | n (%)            | n (%)           |
| <b>Overall</b>                                     | 9252 (100)   | 7044 (76.13)  | 1231 (13.3)      | 977 (10.56)     |
| <b>Socio-demographic</b>                           |              |               |                  |                 |
| <i>Age (years)</i>                                 |              |               |                  |                 |
| <=49                                               | 3680 (39.78) | 2691 (73.11)  | 517 (14.05)      | 473 (12.84)     |
| 50-64                                              | 3058 (33.05) | 2340 (76.53)  | 402 (13.15)      | 316 (10.32)     |
| >=65                                               | 2514 (27.17) | 2013 (80.07)  | 312 (12.4)       | 189 (7.53)      |
| <i>Gender</i>                                      |              |               |                  |                 |
| Men                                                | 2213 (24.26) | 1721 (77.77)  | 189 (8.56)       | 303 (13.67)     |
| Women                                              | 6908 (75.74) | 5256 (76.08)  | 1004 (14.53)     | 649 (9.39)      |
| <i>Education</i>                                   |              |               |                  |                 |
| Advanced/professional degree                       | 2538 (27.44) | 2208 (87)     | 219 (8.64)       | 111 (4.36)      |
| Completed diploma/certificate or bachelor's degree | 4455 (48.15) | 3333 (74.8)   | 616 (13.83)      | 506 (11.36)     |
| Some college or university                         | 1164 (12.58) | 803 (68.98)   | 211 (18.09)      | 151 (12.93)     |
| No formal/some/completed secondary                 | 1095 (11.83) | 700 (63.95)   | 185 (16.89)      | 210 (19.16)     |
| <i>Place of residence</i>                          |              |               |                  |                 |
| Mid-sized town/city                                | 1099 (12.15) | 790 (71.89)   | 187 (16.99)      | 122 (11.12)     |
| Regina                                             | 1828 (20.21) | 1469 (80.38)  | 215 (11.77)      | 144 (7.85)      |
| Rural                                              | 2733 (30.21) | 1879 (68.73)  | 428 (15.66)      | 427 (15.61)     |
| Saskatoon                                          | 3387 (37.44) | 2779 (82.04)  | 365 (10.79)      | 243 (7.17)      |

|                                                                 |              |              |              |             |
|-----------------------------------------------------------------|--------------|--------------|--------------|-------------|
| <i>Immigration status</i>                                       |              |              |              |             |
| Born in Canada                                                  | 7763 (92.66) | 5806 (74.8)  | 1156 (14.89) | 801 (10.31) |
| Born outside Canada; here $\geq 20$ years                       | 435 (5.19)   | 351 (80.64)  | 38 (8.77)    | 46 (10.59)  |
| Born outside Canada; here $< 20$ years                          | 180 (2.15)   | 117 (65.18)  | 40 (22.08)   | 23 (12.74)  |
| <i>Indigenous status*</i>                                       |              |              |              |             |
| No                                                              | 8063 (96.24) | 6087 (75.49) | 1171 (14.52) | 805 (9.98)  |
| Yes                                                             | 315 (3.76)   | 188 (59.55)  | 63 (19.93)   | 65 (20.52)  |
| <i>Employment status</i>                                        |              |              |              |             |
| Employed                                                        | 5263 (56.88) | 3954 (75.14) | 726 (13.8)   | 582 (11.06) |
| Unemployed/retired                                              | 3990 (43.12) | 3090 (77.44) | 505 (12.64)  | 396 (9.91)  |
| <i>Financial security</i>                                       |              |              |              |             |
| Secure (A little/somewhat/absolute)                             | 7524 (81.33) | 5996 (79.68) | 874 (11.62)  | 654 (8.7)   |
| Not secure (A little/somewhat/absolute)                         | 1728 (18.67) | 1048 (60.66) | 357 (20.64)  | 323 (18.7)  |
| <i>Household composition</i>                                    |              |              |              |             |
| Live alone                                                      | 1599 (17.29) | 1203 (75.24) | 207 (12.96)  | 189 (11.8)  |
| Live with only adults                                           | 4806 (51.94) | 3795 (78.95) | 611 (12.72)  | 400 (8.33)  |
| Live with only children                                         | 264 (2.85)   | 179 (67.94)  | 45 (17.19)   | 39 (14.88)  |
| Live with both adults and children                              | 2583 (27.92) | 1867 (72.27) | 367 (14.21)  | 349 (13.52) |
| <b>Risk of exposure to COVID-19</b>                             |              |              |              |             |
| <i>Risk level of places visited</i>                             |              |              |              |             |
| Low risk                                                        | 540 (5.84)   | 459 (85.04)  | 39 (7.18)    | 42 (7.79)   |
| Moderate risk                                                   | 3606 (38.97) | 2902 (80.49) | 428 (11.86)  | 276 (7.65)  |
| High risk                                                       | 5106 (55.19) | 3682 (72.11) | 765 (14.97)  | 659 (12.91) |
| <i>Number of close contacts</i>                                 |              |              |              |             |
| Low risk                                                        | 2884 (35.83) | 2272 (78.78) | 221 (7.68)   | 391 (13.54) |
| Moderate risk                                                   | 2541 (31.57) | 1963 (77.23) | 201 (7.90)   | 378 (14.87) |
| High risk                                                       | 2634 (32.6)  | 1747 (66.57) | 485 (18.49)  | 392 (14.94) |
| <i>Shopping for groceries</i>                                   |              |              |              |             |
| Low risk                                                        | 572 (6.3)    | 514 (89.76)  | 36 (6.31)    | 22 (3.92)   |
| Moderate risk                                                   | 6402 (70.57) | 4972 (77.67) | 856 (13.38)  | 573 (8.95)  |
| High risk                                                       | 2098 (23.13) | 1413 (67.33) | 316 (15.03)  | 370 (17.63) |
| <i>Extent of contact with others while working/volunteering</i> |              |              |              |             |
| Low risk                                                        | 5055 (60.33) | 3890 (76.95) | 692 (13.69)  | 473 (9.36)  |
| Moderate risk                                                   | 1504 (17.95) | 1095 (72.81) | 252 (16.74)  | 157 (10.44) |
| High risk                                                       | 1819 (21.71) | 1290 (70.89) | 290 (15.94)  | 240 (13.16) |
| <i>Travel outside province since start of pandemic</i>          |              |              |              |             |
| Yes                                                             | 3326 (42.03) | 2503 (75.25) | 453 (13.62)  | 370 (11.12) |
| No                                                              | 4586 (57.97) | 3374 (73.57) | 742 (16.18)  | 470 (10.25) |
| <i>Household density</i>                                        |              |              |              |             |
| More than one bedroom per person                                | 1570 (16.96) | 1042 (66.41) | 221 (14.06)  | 307 (19.53) |
| One bedroom per person                                          | 2589 (27.98) | 2050 (79.2)  | 340 (13.13)  | 198 (7.66)  |
| Less than one bedroom per person                                | 5094 (55.06) | 3951 (77.57) | 670 (13.16)  | 473 (9.27)  |
| <b>Mitigating factors</b>                                       |              |              |              |             |
| <i>Face mask use</i>                                            |              |              |              |             |
| Compliant (all/most/some)                                       | 6680 (83.23) | 5337 (79.9)  | 957 (14.33)  | 386 (5.77)  |
| Not compliant (little/none)                                     | 1346 (16.77) | 649 (48.19)  | 234 (17.41)  | 463 (34.4)  |
| <i>Social distancing</i>                                        |              |              |              |             |
| Compliant (all/most/some)                                       | 7403 (92.15) | 5718 (77.23) | 1111 (15)    | 575 (7.76)  |
| Not compliant (little/none)                                     | 631 (7.85)   | 265 (42.02)  | 94 (14.97)   | 271 (43)    |
| <i>Current health status</i>                                    |              |              |              |             |
| Poor/fair                                                       | 2134 (23.07) | 1609 (75.38) | 280 (13.1)   | 246 (11.52) |
| Good                                                            | 3106 (33.57) | 2392 (77)    | 485 (15.62)  | 229 (7.38)  |
| Very good/ excellent                                            | 4012 (43.36) | 3043 (75.86) | 466 (11.62)  | 502 (15.52) |



|                                                                |              |              |               |             |
|----------------------------------------------------------------|--------------|--------------|---------------|-------------|
| <i>Being tested for COVID-19</i>                               |              |              |               |             |
| Yes                                                            | 1966 (21.31) | 1604 (81.55) | 243 (12.37)   | 119 (6.07)  |
| No                                                             | 7261 (78.69) | 5417 (74.6)  | 987 (13.59)   | 857 (11.81) |
| <b>Perceptions</b>                                             |              |              |               |             |
| <i>Prov. gov't is taking steps needed to stop viral spread</i> |              |              |               |             |
| Strongly/somewhat agree                                        | 4587 (52.21) | 3456 (75.35) | 703 (15.32)   | 428 (9.32)  |
| Neither agree nor disagree                                     | 794 (9.03)   | 431 (54.27)  | 110 (13.89)   | 253 (31.85) |
| Strongly/somewhat disagree                                     | 3405 (38.76) | 2759 (81.02) | 379 (11.13)   | 268 (7.86)  |
| <i>People around me follow public health recommendations</i>   |              |              |               |             |
| Strongly/somewhat agree                                        | 5937 (64.17) | 4657 (78.44) | 750 (12.63)   | 530 (8.92)  |
| Neither agree nor disagree                                     | 485 (5.24)   | 257 (53.08)  | 59.13 (12.20) | 168 (34.72) |
| Strongly/somewhat disagree                                     | 2831 (30.59) | 2129 (75.23) | 422 (14.9)    | 280 (9.87)  |
| <i>Threat of COVID-19 to community</i>                         |              |              |               |             |
| Very/fairly small                                              | 2817 (33.62) | 1496 (53.11) | 560 (19.89)   | 761 (27.01) |
| Very/fairly big                                                | 5561 (66.38) | 4779 (85.93) | 674 (12.12)   | 109 (1.96)  |
| <i>Likelihood of becoming infected in next week</i>            |              |              |               |             |
| Not at all                                                     | 6009 (71.73) | 4432 (73.76) | 836 (13.91)   | 741 (12.34) |
| Somewhat/fairly/very likely                                    | 2369 (28.27) | 1842 (77.77) | 398 (16.81)   | 128 (5.41)  |
| <i>Anticipated consequences of infection</i>                   |              |              |               |             |
| Would not get very sick at all                                 | 1405 (15.18) | 751 (53.45)  | 201(14.31)    | 453 (32.24) |
| Would develop mild to moderate disease                         | 4900 (52.96) | 3825 (78.06) | 666 (13.6)    | 409 (8.34)  |
| Would get very sick                                            | 2483 (26.85) | 2097 (84.42) | 292 (11.75)   | 95 (3.83)   |
| Likely to die                                                  | 464 (5.01)   | 371 (80.06)  | 72 (15.47)    | 21 (4.47)   |
| <i>Concern about spreading infection if infected</i>           |              |              |               |             |
| Very concerned                                                 | 6658 (79.47) | 5418 (81.37) | 945 (14.19)   | 295 (4.44)  |
| Somewhat concerned                                             | 1066 (12.73) | 651 (61.06)  | 173 (16.25)   | 242 (22.69) |
| Slightly/hardly concerned at all                               | 654 (7.80)   | 206 (31.45)  | 116 (17.71)   | 332 (50.83) |

224 \*Indigenous persons originating from North America included First Nations, Inuit, Métis, and others.

## 225 **Predictors of vaccine acceptance**

226 Multinomial logistic regression modeling found several sociodemographic variables to be associated with  
 227 refusing vaccination, being unsure, or both (see Fig 1 for adjusted relative risk ratios (aRRR) and 95%  
 228 confidence intervals (CI)). Financially insecure respondents were more likely to refuse to be vaccinated or  
 229 to be unsure. Education level was strongly associated with vaccine intentions: respondents who had less  
 230 than an advanced or professional degree were much more likely to refuse vaccination or be unsure.  
 231 Respondents who self-identified as Indigenous were 2.4 times as likely to refuse vaccination and 1.7  
 232 times as likely to be unsure.

233 Gender was related to vaccine hesitancy but not refusal, with women more likely to be hesitant than men.  
 234 Similarly, being born outside Canada and living in the country for <20 years was associated with a greater  
 235 likelihood of vaccine hesitancy, but not refusal. Compared with respondents residing in mid-sized towns  
 236 or cities, Saskatoon residents were less likely to refuse vaccination. Respondents living only with other  
 237 adults were less likely to be vaccine refusers than respondents living alone.

238 Only one exposure risk was predictive of vaccine intentions: Respondents with moderate or high risk  
 239 levels for coronavirus exposure related to grocery shopping were more likely to be unsure about getting  
 240 vaccinated.

241 In terms of mitigating behaviours, vaccine refusers were less likely to wear face masks and to socially  
242 distance.

243 Several perceptions were associated with vaccine intentions. Respondents who neither agreed nor  
244 disagreed that the government was taking the right steps to stop the spread of the virus and that people  
245 around them were following public health recommendations were more likely to refuse to be vaccinated,  
246 compared to those who agreed with these statements.

247 Respondents' degree of concern that they could spread the virus to others were they to become infected  
248 was positively associated with vaccine acceptance. Compared to respondents who were very concerned  
249 about spreading the infection, those who were "somewhat concerned" were 2.7 times more likely to  
250 refuse vaccinations and those who reported "slight concern" were 7.4 times more likely. Respondents  
251 who reported "slight concern" about spreading the coronavirus to others were 2.5 times more likely to be  
252 unsure about vaccination, compared to respondents who reported being "very concerned."

253 Respondents' beliefs about the threat posed by COVID-19 to their community and to themselves  
254 personally were also associated with the likelihood of getting vaccinated. Respondents who perceived  
255 COVID-19 as a fairly or very big threat were 86% less likely to refuse vaccination), and 57% less likely  
256 to be unsure compared to those who believed the threat was fairly or vary small. Compared with  
257 respondents who believed they would not get very sick at all if they contracted the virus, the likelihood of  
258 vaccine refusal was 50% lower among those who felt they would develop mild to moderate symptoms,  
259 65% lower among those who believed they would get very sick, and 70% lower among those who  
260 believed they would likely die. Those who believed they were likely to be very sick were less likely to be  
261 unsure about getting vaccinated, compared to those who believed they would not get sick.

262

263 **[Insert Fig 1 here]**

264 Fig 1. Adjusted relative risk ratios for the determinants of COVID-19 vaccine readiness in Saskatchewan,  
265 Canada. Color code: black (reference), green (protective effect on vaccination), red (harmful effect on  
266 vaccination), and purple (not statistically significant)

267

268

269 **[Insert Fig 2 here]**

270 Fig 2. Decision tree model for COVID-19 vaccine intentions in Saskatchewan, Canada.

271

## 272 **Classification and regression tree**

273 In the root node of the decision tree, 76.88% of respondents had already been or intended to be vaccinated  
274 ("vaccine ready"), 10.95% refused, and 12.18% were unsure (Fig 2). The first determining factor (first-  
275 level node) of COVID-19 vaccine intent in Saskatchewan was the level of perceived threat of the  
276 pandemic in the community (column contribution=0.4428,  $G^2$ -statistic=913.57) (Table 3). Table 3 shows  
277 each successive determining factor, in descending order of contribution or importance.

278 Among those who perceived COVID-19 as a small threat to their community, 55.49% were vaccine  
279 ready, 24.7% refused, and 19.81% were unsure (LogWorth=100.59,  $G^2$ -statistic=4649.64). In contrast,  
280 among those who perceived the pandemic to be a serious threat, 86.94% were vaccine ready, while only  
281 4.47% refused and 8.58% were unsure (LogWorth=82.62,  $G^2$ -statistic=4691.23).

282 The best discriminator for the perceived small threat to the community was personal concern about  
283 spreading the virus to others if infected. Out of the respondents who perceived COVID-19 to be a small  
284 threat, 63.35% of those who were concerned about transmitting the virus if infected were vaccine ready,

285 15.74% refused and 20.91% unsure. In contrast, more than half of those who were not concerned about  
 286 transmitting the virus were vaccine refusers (63.11%), while less than 21.81% were vaccine ready and  
 287 15.08% were unsure.

288 Compliance with face mask wearing was the major discriminator of placement in the group of  
 289 respondents who perceived COVID-19 as a big threat. Among those who perceived COVID-19 as a big  
 290 threat and complied with mask wearing, 83.61% were vaccine ready, 14.76% refused, while 1.61% were  
 291 unsure. Surprisingly, 87.79% of those people who were less compliant with mask wearing were also  
 292 vaccine ready, with vaccine refusers and those who were unsure making up 1.84% and 10.37%,  
 293 respectively. The determining factor for vaccine intentions in the group that complied with mask wearing  
 294 was compliance with social distancing measures. Financial stability determined the splitting of people in  
 295 the non-compliant mask wearing group. Over 80% of the vaccine ready group who reported compliance  
 296 with social distancing measures were also wearing masks consistently, but 9.96% refused and 1.17% were  
 297 hesitant. On the other hand, 0.87% of the vaccine ready group that reported non-compliance with social  
 298 distancing measures were consistently wearing masks, and 99.13% refused a vaccine. In the group that  
 299 did not comply with mask wearing but were financially stable, 91.07% were vaccine ready, 1.02%  
 300 refused and 7.9% were hesitant. Among those who were non-compliant to mask wearing and not  
 301 financially stable, 70.08% were vaccine ready, 6.23% refused and 23.68% were hesitant.  
 302 Overall, respondents who perceived a greater threat of COVID-19 to the community were more likely to  
 303 be vaccinated but individual concerns about viral transmission to others was also critical. For those who  
 304 perceived a lesser COVID-19 threat, financial stability played a prominent role, with financially stable  
 305 people having more inclination towards vaccines.

306

307 Table 3. Column contributions of independent variables in CART model

| Variable                       | Number of Splits | G <sup>2</sup> | Contributions | Portion |
|--------------------------------|------------------|----------------|---------------|---------|
| Perceived threat of pandemic   | 1                | 913.566238     |               | 0.4428  |
| Concerns about spreading COVID | 1                | 401.256045     |               | 0.1945  |
| Facemask wearing               | 1                | 330.763148     |               | 0.1603  |
| Social distancing              | 1                | 236.898681     |               | 0.1148  |
| Financial stability            | 1                | 180.772692     |               | 0.0876  |

308

### 309 **Model validation**

310 Based on the AIC and BIC values from the multinomial regression, the parsimonious model fitted better  
 311 than the full (saturated) model. The AIC values were 5732.91 and 5736.37 for the parsimonious and full  
 312 models, respectively. Also, BIC was much lower (6272.87) for the parsimonious model, compared to  
 313 6316.72 for the full model. The adjusted R-squared showed that 24.96% of the variations in the outcome  
 314 variable was explained by the independent variables in the final parsimonious model. However, the  
 315 AUROC curve for vaccine acceptance was 0.78, translating to sensitivity and specificity rates of 79.54%  
 316 and 28.92%, respectively.

317 For CART, the AUROC curves for vaccine acceptance in the training set was 0.77 (translating to  
 318 sensitivity rate of 98.36% and specificity rate of 18.51%), and validation set was 0.71 (translating to  
 319 sensitivity rate of 98.78% and specificity rate of 18.49%). The similar patterns of AUROC curves and lift  
 320 curves for training and validation sets suggest that the tree model did not overfit the data. Also, the  
 321 training RASE (0.423) was relatively lower than validation RASE (0.4433), further confirming that

322 training dataset fits better than the validation set. Similar to multinomial regression model, the proportion  
323 of variance explained by the tree model was 23.24%.

## 324 Discussion

325 Using two different modelling techniques (i.e., conventional statistical and machine learning approaches)  
326 give more confidence to the study findings. This study uncovered factors associated with COVID-19  
327 vaccine intentions in Saskatchewan, Canada. Both multinomial regression and CART models showed  
328 good sensitivity (i.e., ability to correctly identify people who reported willingness to be vaccinated) but  
329 poor specificity (i.e., ability to correctly identify people who were hesitant or refused vaccines). We  
330 observed that sensitivity was higher for the CART model, however, the multinomial regression model had  
331 higher specificity. The findings from these analytical methods converged.

332 Overall, our sample had a vaccine acceptance rate of 76%, while one in ten did not intend to be  
333 vaccinated, and another 13% had not yet decided. The percentage accepting vaccination is very similar to  
334 that of Canada overall (76.9%)<sup>13</sup>, the United Kingdom (71.1%)<sup>25</sup> and France (77.6%)<sup>26</sup>. Countries with  
335 higher vaccination acceptance rates include Ecuador (97%)<sup>27</sup> and China (91.3%)<sup>28</sup>, while others, notably  
336 the United States (67%)<sup>29</sup> and Australia (59%)<sup>30</sup>, are lower.

337 Respondents who said they would not get vaccinated and those who were unsure shared several  
338 important characteristics. They tend to have lower education levels and are more likely to be financially  
339 insecure and Indigenous than those who have been or plan to be vaccinated. They also share some key  
340 beliefs: that the pandemic is not a big threat to their community, that they are unlikely to become ill  
341 should they get infected, and that the possibility of spreading the virus to others is not concerning.

342 These findings suggest some direction for efforts to increase vaccine acceptance. First, extra effort must  
343 be made to reach the demographic groups that are least likely to seek vaccination on their own, by  
344 working with organizations and agencies that have already established good relationships with these  
345 population sectors to provide information, role modelling, and where feasible, access to vaccines. The  
346 vaccination rollout amongst Indigenous residents of Saskatchewan to date is an example of the difference  
347 such an approach can make. Indigenous people tend to be at greater risk of severe COVID-19 infection  
348 and they also tend to be less trusting of the healthcare system and government initiatives. Delivery of  
349 vaccines to Indigenous communities as well as Indigenous people living away from their communities  
350 has been prioritized and planned and led by First Nations and Métis partners, supported by the federal  
351 government through Indigenous Services Canada (ISC). Several Indigenous organizations have set up  
352 their own vaccine clinics in partnership with the provincial health authority and ISC, focusing on  
353 providing a safe cultural space and removing barriers such as lack of transportation.<sup>31,32</sup>

354 First Nations and the Metis Nation have also used a variety of communication channels including social  
355 media and radio to encourage their members to get vaccinated in order to protect their community. Elders  
356 have played a central role as early adopters of vaccines, providers of cultural support, and translators.<sup>33</sup>

357 While vaccine administration is still underway, as of the time of writing, uptake among Indigenous people  
358 in Saskatchewan appears to be much better than expected.<sup>34,35</sup>

359 Another socio-demographic characteristic we found to be associated with a higher likelihood of refusing  
360 vaccination or being hesitant is financial insecurity (self-assessed). The pandemic has shone a spotlight on  
361 health inequities in Canada, with higher rates of infection in many low-income areas.<sup>36</sup> In addition, the  
362 restrictions of economic activity imposed during the pandemic have increased financial instability for  
363 many people, with those who were already on lower incomes more likely to be affected.<sup>37</sup> Now, reports

364 suggest that people living in low-income neighbourhoods are less likely to be vaccinated.<sup>38</sup> While this  
365 may in part reflect the less positive views of vaccination we found among people experiencing financial  
366 instability, it is also important to consider and remove barriers to accessing vaccination. For example,  
367 many vaccinations have been provided in Saskatoon and Regina at drive-through clinics that require  
368 individuals to have a vehicle and time to wait in a long line. Even finding out how and where to get  
369 vaccinated can be more challenging for those with fewer financial means, especially as the options have  
370 become more complicated. Individuals who are determined to get vaccinated whatever it takes have  
371 shown great tenacity in achieving their goal but for others, vaccination must be made much easier to  
372 access. Those who are unsure about the safety and value of vaccination could be easily dissuaded if their  
373 initial attempts to find an appointment are unsuccessful. Moreover, even some who said they would get  
374 vaccinated may give up if the challenges are too great, especially if their lives are filled with other  
375 challenges. Innovative strategies such as mobile or pop-up clinics that take the vaccines to where people  
376 who need them are, combined with the opportunity to have questions answered in plain language, are  
377 likely what will be required.

378 Understanding the differences between these two groups—those who refuse to get vaccinated and those  
379 who are hesitant—rather than lumping them together as “anti-vaxxers” is also important.<sup>35</sup> We found that  
380 those who refuse vaccines (but not those who are unsure) are less likely to report wearing a face mask and  
381 physically distancing. This is troubling. If sufficient numbers of Saskatchewan residents refuse to be  
382 vaccinated, and these individuals are also unwilling to follow public health measures that reduce viral  
383 spread, the risk remains that SARS-CoV-2 will continue to circulate, especially as the province “re-  
384 opens” and more transmissible variants become dominant.

385 To maximize the likelihood of achieving herd immunity, in the absence of government-mandated  
386 vaccination, the ‘vaccine refusal’ group needs to be kept as small as possible. Individuals who are unsure  
387 about vaccination are likely more open to education and influence regarding the safety and value of being  
388 vaccinated than “anti-vaxxers” and efforts to convince them to get vaccinated are therefore likely to yield  
389 greater results. Our finding regarding gender differences illustrates the fluidity in vaccine intentions:  
390 Women in our survey were more likely to be unsure about vaccination, but not more likely to refuse to be  
391 vaccinated. As Saskatchewan’s vaccination program has continued to be implemented, however, more  
392 women have been vaccinated than men in every age group, indicating that whatever hesitancy we found  
393 among women was overcome by the time they were eligible for vaccination.<sup>39</sup>

394 The other demographic group in which we found a tendency to be unsure about vaccination is newcomers  
395 to Canada (less than 20 years in the country). Data on vaccine acceptance by immigration status is not  
396 available, but this finding suggests it would be prudent to work with settlement agencies and other  
397 organizations serving newcomers to make sure they have good access to the information they need to  
398 address any concerns about vaccination and that vaccination is available somewhere they can easily get to  
399 and feel comfortable in. Ideally this would include materials in the language they are most comfortable  
400 with, opportunities to have questions answered by someone they trust who is knowledgeable, and  
401 encouragement and reassurance from those within their community who have already been vaccinated.  
402 One example of this is a vaccine clinic held in May 2021 in a welcome centre for immigrants and  
403 refugees in Saskatoon, with interpreters providing translation in several languages.<sup>40</sup>

404 The federal government has recognized the value of supporting community-based promotion and delivery  
405 of vaccination by providing funding for organizations through its Vaccine Community Innovation  
406 Challenge; however, none of the recipients are located in Saskatchewan.<sup>41</sup> Similarly, Manitoba announced  
407 in June 2021 that organizations, businesses, churches and others working in and with “low-uptake



408 communities” could apply for a ProtectMB Community Outreach and Incentive Grant to address vaccine  
409 hesitancy.<sup>42</sup>

410 The differences in beliefs between those who are ‘vaccine ready’ and those who are not can help us tailor  
411 communications to increase the perceived importance of vaccinations. It makes sense that individuals  
412 who believe that COVID-19 poses a significant threat to their community and to themselves and are  
413 concerned about the possibility of spreading the virus to others would be more likely to want to get  
414 vaccinated, to protect themselves and those around them. This is consistent with research that has found  
415 perceived threat to be a strong predictor of self-protective behaviour in the context of COVID-19<sup>43,44</sup> and  
416 underscores the important role emotional factors play. Those who do not share these beliefs may have  
417 been exposed to different sources of information, in their social circles and online, including  
418 disinformation about the severity of the pandemic and their personal risk, and have less trust in public  
419 health and medical authorities.<sup>35</sup> They may also have been influenced by what they have observed around  
420 them; if they have not known anyone personally who experienced more severe COVID or did not hear of  
421 many cases in their local community, this could create a false sense of security. It is important to  
422 recognize, as well, that people may not want to get vaccinated for other reasons, and convince themselves  
423 that the pandemic is not a threat, that they have a strong enough immune system, and that they wouldn’t  
424 spread it to others in order to justify their aversion to vaccination; in other words, the beliefs they  
425 expressed that we found to be associated with lower likelihood of getting vaccinated may not actually be  
426 the causes of not being vaccinated.

427 The paradox here is that as vaccination rates rise, case numbers, hospitalizations and deaths are all  
428 decreasing, which makes it more difficult to convince those who did not already believe that COVID was  
429 a threat to their community. However, evidence is also accumulating that the unvaccinated now make up  
430 the majority of those who are falling ill and requiring hospitalization. Messages that emphasize the risk  
431 faced by individuals who are not vaccinated may help to persuade some of those who are unsure, even in  
432 the context of declining overall case numbers.

433 Some of the factors that we found to not be associated with vaccine intentions are also interesting to  
434 consider. Logically, those who are older, in poorer health, and who believed they were likely to become  
435 infected would all have good reason to want to be vaccinated, especially given the strong messaging in  
436 the media regarding the impact of age and pre-existing health conditions on COVID-19 outcomes. Yet  
437 none of these variables were found to predict vaccine intentions. This is good news, of course, because  
438 the widespread vaccination needed to protect the whole population cannot rely solely on perceptions of  
439 individual risk. It is encouraging that while 72% of respondents assessed their own risk of becoming  
440 infected as extremely low, the majority also perceived COVID-19 to be a big threat to their community  
441 (66%) and were very concerned about spreading the virus to others should they become infected (80%)  
442 and that these two variables were the strongest predictors of intention to get vaccinated. This suggests that  
443 most people who are getting vaccinated are considering not only what is best for them but also what is  
444 best for those around them.

445 In some of the later cycles of this survey, we asked those who said they would not get vaccinated and  
446 those who didn’t know to indicate their reasons. insufficient clinical trials conducted to evaluate safety  
447 (13.7%), lack of trust in the vaccine approval process (1.8%), misconceptions/conspiracy  
448 theories/misgivings about vaccine safety (1.2%), medical reasons (hypersensitivity to vaccines) (0.88%),  
449 and religious grounds (0.11%). These responses are consistent with what has been observed and  
450 extensively commented on in the media and are not surprising, given the huge amount of information  
451 about vaccines circulating: from disinformation to misinformation to information that is developing over  
452 time and difficult to understand. It is possible that many or most vaccine refusers will hold tight to their



453 beliefs about why vaccination is unnecessary or harmful. But if vaccination is made easier and more  
454 accessible to everyone and those with questions get satisfactory answers, simply observing more and  
455 more people getting safely vaccinated and experiencing the benefits may be enough to convince those  
456 who were initially unsure.

457 This study had one main limitation, non-participation bias due to the data collection method used (i.e.,  
458 web-based, and random digit dialling). To minimize its effect, the samples were weighted using the 2016  
459 Census to ensure representativeness of the Saskatchewan population. As well, this study has some  
460 strengths. The strength of evidence from this study is robust because of the plurality of analytical methods  
461 used. The findings from CART further corroborate the results from the multinomial regression, hence the  
462 associations reported were less likely due to chance. As far as we know, no previous published research  
463 has investigated the factors associated with COVID-19 vaccine intention in Saskatchewan. This study  
464 provides more insights to guide stakeholders in the implementation of current COVID-19 vaccination  
465 strategies. Since issues of COVID-19 vaccine hesitancy and rejection in Saskatchewan can change over  
466 time, continuous data collection systems should be introduced.

467

## 468 **Conclusion**

469 This study has shown that many Saskatchewan residents are vaccine ‘ready’ (received already or intent to  
470 receive one), one in four are either hesitant or will not receive vaccine. Reaching sufficient coverage of  
471 the population is likely to require targeted efforts to convince those who are hesitant or unsure. Targeted  
472 and accurate messaging to specific socio-demographic groups who are less likely to be vaccinated, and  
473 encouragement and modeling by people who they trust, are crucial steps. Further, ensuring a successful  
474 vaccination campaign will also entail rebuilding public trust through transparent action, clear  
475 communication and demonstrated accountability of the key stakeholders in our society, including  
476 governments and health care systems.

477

### 478 **Data availability**

479 The dataset for this study is available from N.M on reasonable request.

480

### 481 **Authors’ contributions**

482 Conceptualization: N.M. and M.F.; methodology: N.M., D.A., J.Mc.; formal analysis: D.A.; interpretation  
483 and writing, review, and editing: D.A., N.M., K.G., J.Mc, M.F., N.K.; supervision and resources: N.M.;  
484 All authors have read and agreed to the submission of the manuscript.

485

### 486 **Acknowledgements**

487 This work arises at a time of significant social disruption due to COVID-19. The authors thank the many  
488 thousands of Saskatchewan residents who participated in this study.

489

### 490 **Funding**

491 Social Contours and COVID-19 received funding from 2020 Rapid Response COVID-19 Research  
492 Award, College of Medicine, University of Saskatchewan.

493

### 494 **Competing interests**

495 The authors declare no conflict of interest or stand to benefit from this work in any material manner.

496

497

498 **References**

- 499 1. World Health Organization. Coronavirus disease (COVID-19). *World Health Organization*,  
500 <https://www.who.int/emergencies/diseases/novel-coronavirus-2019> (2021, accessed 4 June 2021).
- 501 2. Government of Canada. Coronavirus disease (COVID-19): Outbreak update,  
502 [https://www.canada.ca/en/public-health/services/diseases/2019-novel-coronavirus-](https://www.canada.ca/en/public-health/services/diseases/2019-novel-coronavirus-infection.html#a1)  
503 [infection.html#a1](https://www.canada.ca/en/public-health/services/diseases/2019-novel-coronavirus-infection.html#a1) (2021, accessed 4 June 2021).
- 504 3. World Health Organization. Coronavirus disease (COVID-19): Herd immunity, lockdowns and  
505 COVID-19, <https://www.who.int/news-room/q-a-detail/herd-immunity-lockdowns-and-covid-19>  
506 (2020, accessed 11 May 2021).
- 507 4. Bartsch SM, O’Shea KJ, Ferguson MC, et al. Vaccine efficacy needed for a COVID-19  
508 coronavirus vaccine to prevent or stop an epidemic as the sole Intervention. *Am J Prev Med* 2020;  
509 59: 493–503.
- 510 5. Fontanet A, Cauchemez S. COVID-19 herd immunity: where are we? *Nature Reviews*  
511 *Immunology* 2020; 20: 583–584.
- 512 6. COVID-19: Science in 5: Episode #1 - Herd immunity,  
513 [https://www.who.int/emergencies/diseases/novel-coronavirus-2019/media-resources/science-in-](https://www.who.int/emergencies/diseases/novel-coronavirus-2019/media-resources/science-in-5/episode-1)  
514 [5/episode-1](https://www.who.int/emergencies/diseases/novel-coronavirus-2019/media-resources/science-in-5/episode-1) (2020, accessed 11 May 2021).
- 515 7. Anderson RM, Vegvari C, Truscott J, et al. Challenges in creating herd immunity to SARS-CoV-2  
516 infection by mass vaccination. 2020; 396: 1614–1616.
- 517 8. Ashwanden C. Five reasons why COVID herd immunity is probably impossible. *Nature* 2021;  
518 591: 520–522.
- 519 9. Polack FP, Thomas SJ, Kitchin N, et al. Safety and efficacy of the BNT162b2 mRNA covid-19  
520 vaccine. *N Engl J Med* 2020; 383: 2603–2615.
- 521 10. Voysey M, Clemens SAC, Madhi SA, et al. Safety and efficacy of the ChAdOx1 nCoV-19 vaccine  
522 (AZD1222) against SARS-CoV-2: an interim analysis of four randomised controlled trials in  
523 Brazil, South Africa, and the UK. *Lancet* 2021; 397: 99–111.
- 524 11. WHO. *Report of the SAGE Working Group on Vaccine hesitancy*. 2014.
- 525 12. Dzieciolowska S, Hamel D, Gadio S, et al. Covid-19 vaccine acceptance, hesitancy and refusal  
526 among Canadian healthcare workers: a multicenter Survey. *Am J Infect Control*. Epub ahead of  
527 print 2021. DOI: 10.1016/j.ajic.2021.04.079.
- 528 13. Statistics Canada. COVID-19 vaccine willingness among Canadian population groups,  
529 <https://www150.statcan.gc.ca/n1/pub/45-28-0001/2021001/article/00011-eng.htm> (2021, accessed  
530 9 May 2021).
- 531 14. Frank K, Arim R. *Canadians’ willingness to get a COVID-19 vaccine: Group differences and*  
532 *reasons for vaccine hesitancy*, [www.statcan.gc.ca](http://www.statcan.gc.ca) (25 August 2020, accessed 11 May 2021).
- 533 15. Griffith J, Marani H, Monkman H. COVID-19 Vaccine hesitancy in Canada: content analysis of  
534 tweets using the theoretical domains framework. *J Med Internet Res* 2021; 23: e26874.
- 535 16. Angus Reid Institute. COVID-19: Canadians’ willingness to be inoculated right away increases  
536 again as new vaccine approved, <https://angusreid.org/covid-vaccine-march/> (2021, accessed 11  
537 May 2021).
- 538 17. BEworks. COVID-19 vaccine hesitancy: a behavioural lens on a critical problem,  
539 [https://www.flipsnack.com/beworks/vaccine-hesitancy-a-behavioral-lens-on-a-critical-](https://www.flipsnack.com/beworks/vaccine-hesitancy-a-behavioral-lens-on-a-critical-problem/full-view.html)  
540 [problem/full-view.html](https://www.flipsnack.com/beworks/vaccine-hesitancy-a-behavioral-lens-on-a-critical-problem/full-view.html) (2021, accessed 11 May 2021).
- 541 18. Angus Reid Institute. Despite months of mixed messages, most Canadians who received an  
542 AstraZeneca vaccine have no regrets, <https://angusreid.org/canada-astrazeneca-herd-immunity/>  
543 (2021, accessed 11 June 2021).
- 544 19. Statistics Canada. Population estimates, quarterly,  
545 <https://www150.statcan.gc.ca/t1/tb11/en/tv.action?pid=1710000901> (2021, accessed 24 May  
546 2021).
- 547 20. Stonechild B. Indigenous Peoples of Saskatchewan. *Indigenous Saskatchewan Encyclopedia -*  
548 *University of Saskatchewan*,

- 549 [https://teaching.usask.ca/indigenoussk/import/indigenous\\_peoplesof\\_saskatchewan.php](https://teaching.usask.ca/indigenoussk/import/indigenous_peoplesof_saskatchewan.php) (accessed  
550 9 June 2021).
- 551 21. Lavery R, Mawr B. *An Animated Guide: Regression Trees in JMP® & SAS® Enterprise Miner™*.  
552 2012.
- 553 22. Stata version 16.1, <https://www.stata.com/order/> (2019, accessed 30 May 2019).
- 554 23. Kino S, Hsu Y-T, Shiba K, et al. A scoping review on the use of machine learning in research on  
555 social determinants of health: Trends and research prospects. *SSM - Popul Heal* 2021; 15: 100836.
- 556 24. SAS. JMP: Statistics, predictive modeling and data mining,  
557 [https://www.jmp.com/en\\_ca/events/ondemand/webcasts/by-application-area/statistics-predictive-](https://www.jmp.com/en_ca/events/ondemand/webcasts/by-application-area/statistics-predictive-modeling-and-data-mining.html)  
558 [modeling-and-data-mining.html](https://www.jmp.com/en_ca/events/ondemand/webcasts/by-application-area/statistics-predictive-modeling-and-data-mining.html) (accessed 11 May 2021).
- 559 25. Freeman D, Loe BS, Chadwick A, et al. COVID-19 vaccine hesitancy in the UK: The Oxford  
560 coronavirus explanations, attitudes, and narratives survey (Oceans) II. *Psychol Med* 2021; 1–15.
- 561 26. Detoc M, Bruel S, Frappe P, et al. Intention to participate in a COVID-19 vaccine clinical trial and  
562 to get vaccinated against COVID-19 in France during the pandemic. *Vaccine* 2020; 38: 7002–  
563 7006.
- 564 27. Sarasty O, Carpio CE, Hudson D, et al. The demand for a COVID-19 vaccine in Ecuador. *Vaccine*  
565 2020; 38: 8090–8098.
- 566 28. Wang J, Jing R, Lai X, et al. Acceptance of covid-19 vaccination during the covid-19 pandemic in  
567 China. *Vaccines* 2020; 8: 1–14.
- 568 29. Malik AA, McFadden SAM, Elharake J, et al. Determinants of COVID-19 vaccine acceptance in  
569 the US. *EClinicalMedicine*; 26. Epub ahead of print 2020. DOI: 10.1016/j.eclinm.2020.100495.
- 570 30. Edwards B, Biddle N, Gray M, et al. COVID-19 vaccine hesitancy and resistance: Correlates in a  
571 nationally representative longitudinal survey of the Australian population. *PLoS One* 2021; 16:  
572 e0248892.
- 573 31. Métis Nation Saskatchewan. Vaccinated Métis Strong, <https://metisnation.sk.com/vaccine/> (2021,  
574 accessed 11 June 2021).
- 575 32. CBC News. Saskatoon Tribal Council-run vaccine clinic for Indigenous and non-Indigenous  
576 people opens next week, [https://www.cbc.ca/news/canada/saskatoon/saskatoon-tribal-council-](https://www.cbc.ca/news/canada/saskatoon/saskatoon-tribal-council-vaccine-clinic-sasktel-centre-1.5971697)  
577 [vaccine-clinic-sasktel-centre-1.5971697](https://www.cbc.ca/news/canada/saskatoon/saskatoon-tribal-council-vaccine-clinic-sasktel-centre-1.5971697) (2021, accessed 11 June 2021).
- 578 33. Saskatoon StarPhoenix. Indigenous leaders take to radio, social media to encourage vaccination,  
579 [https://thestarphoenix.com/news/saskatchewan/indigenous-leaders-take-to-radio-social-media-to-](https://thestarphoenix.com/news/saskatchewan/indigenous-leaders-take-to-radio-social-media-to-encourage-vaccination)  
580 [encourage-vaccination](https://thestarphoenix.com/news/saskatchewan/indigenous-leaders-take-to-radio-social-media-to-encourage-vaccination) (2021, accessed 11 June 2021).
- 581 34. CTV News. Officials explain high vaccination rate on Sask. First Nations,  
582 <https://regina.ctvnews.ca/officials-explain-high-vaccination-rate-on-sask-first-nations-1.5315333>  
583 (2021, accessed 11 June 2021).
- 584 35. Vescera Z. Vaccine uptake high in many Sask. First Nations. *Saskatoon StarPhoenix*,  
585 <https://thestarphoenix.com/news/saskatchewan/vaccine-uptake-high-in-many-sask-first-nations>  
586 (2021, accessed 11 June 2021).
- 587 36. CBC News. Canadians in poor neighbourhoods had most COVID-related ER visits, data shows,  
588 <https://www.cbc.ca/news/health/covid-19-neighbourhoods-income-cihi-1.5836427> (2020,  
589 accessed 11 June 2021).
- 590 37. Witteveen D, Velthorst E. Economic hardship and mental health complaints during COVID-19.  
591 *Proc Natl Acad Sci U S A* 2020; 117: 27277–27284.
- 592 38. Vescera Z. Poorest Sask. neighbourhoods have lowest COVID-19 vaccination rates. *Saskatoon*  
593 *StarPhoenix*, [https://thestarphoenix.com/news/local-news/poorest-sask-neighbourhoods-have-](https://thestarphoenix.com/news/local-news/poorest-sask-neighbourhoods-have-lowest-covid-19-vaccination-rates)  
594 [lowest-covid-19-vaccination-rates](https://thestarphoenix.com/news/local-news/poorest-sask-neighbourhoods-have-lowest-covid-19-vaccination-rates) (2021, accessed 11 June 2021).
- 595 39. Government of Canada. COVID-19 vaccination coverage in Canada, [https://health-](https://health-infobase.canada.ca/covid-19/vaccination-coverage/)  
596 [infobase.canada.ca/covid-19/vaccination-coverage/](https://health-infobase.canada.ca/covid-19/vaccination-coverage/) (2021, accessed 13 May 2021).
- 597 40. Vescera Z. The cure for vaccine hesitancy? Outreach and education, Sask. doctor says. *Saskatoon*  
598 *StarPhoenix*, [https://thestarphoenix.com/news/saskatchewan/the-cure-for-vaccine-hesitancy-](https://thestarphoenix.com/news/saskatchewan/the-cure-for-vaccine-hesitancy-outreach-and-education-sask-doctor-says)  
599 [outreach-and-education-sask-doctor-says](https://thestarphoenix.com/news/saskatchewan/the-cure-for-vaccine-hesitancy-outreach-and-education-sask-doctor-says) (2021, accessed 11 June 2021).

- 600 41. Government of Canada. Vaccine Community Innovation Challenge: Funding recipients,  
601 <https://www.canada.ca/en/public-health/services/funding-opportunities/grant-contribution->  
602 [funding-opportunities/vaccine-community-innovation-challenge/finalists.html](https://www.canada.ca/en/public-health/services/funding-opportunities/grant-contribution-) (2021, accessed 11  
603 June 2021).
- 604 42. Government of Manitoba. News Releases: Manitoba launches community outreach vaccination  
605 effort to protect Manitobans from COVID-19,  
606 <https://news.gov.mb.ca/news/index.html?item=51376&posted=2021-06-03> (2021, accessed 11  
607 June 2021).
- 608 43. Smith TC. Vaccine rejection and hesitancy: A review and call to action. *Open Forum Infect Dis*; 4.  
609 Epub ahead of print 2017. DOI: 10.1093/ofid/ofx146.
- 610 44. Vacondio M, Priolo G, Dickert S, et al. Worry, Perceived Threat and Media Communication as  
611 Predictors of Self-Protective Behaviors During the COVID-19 Outbreak in Europe. *Front Psychol*  
612 2021; 12: 231.
- 613 45. Lazarus J V., Ratzan SC, Palayew A, et al. A global survey of potential acceptance of a COVID-  
614 19 vaccine. *Nat Med* 2021; 27: 225–228.
- 615 46. Siegrist M, Zingg A. The role of public trust during pandemics: Implications for crisis  
616 communication. *Eur Psychol* 2014; 19: 23–32.  
617

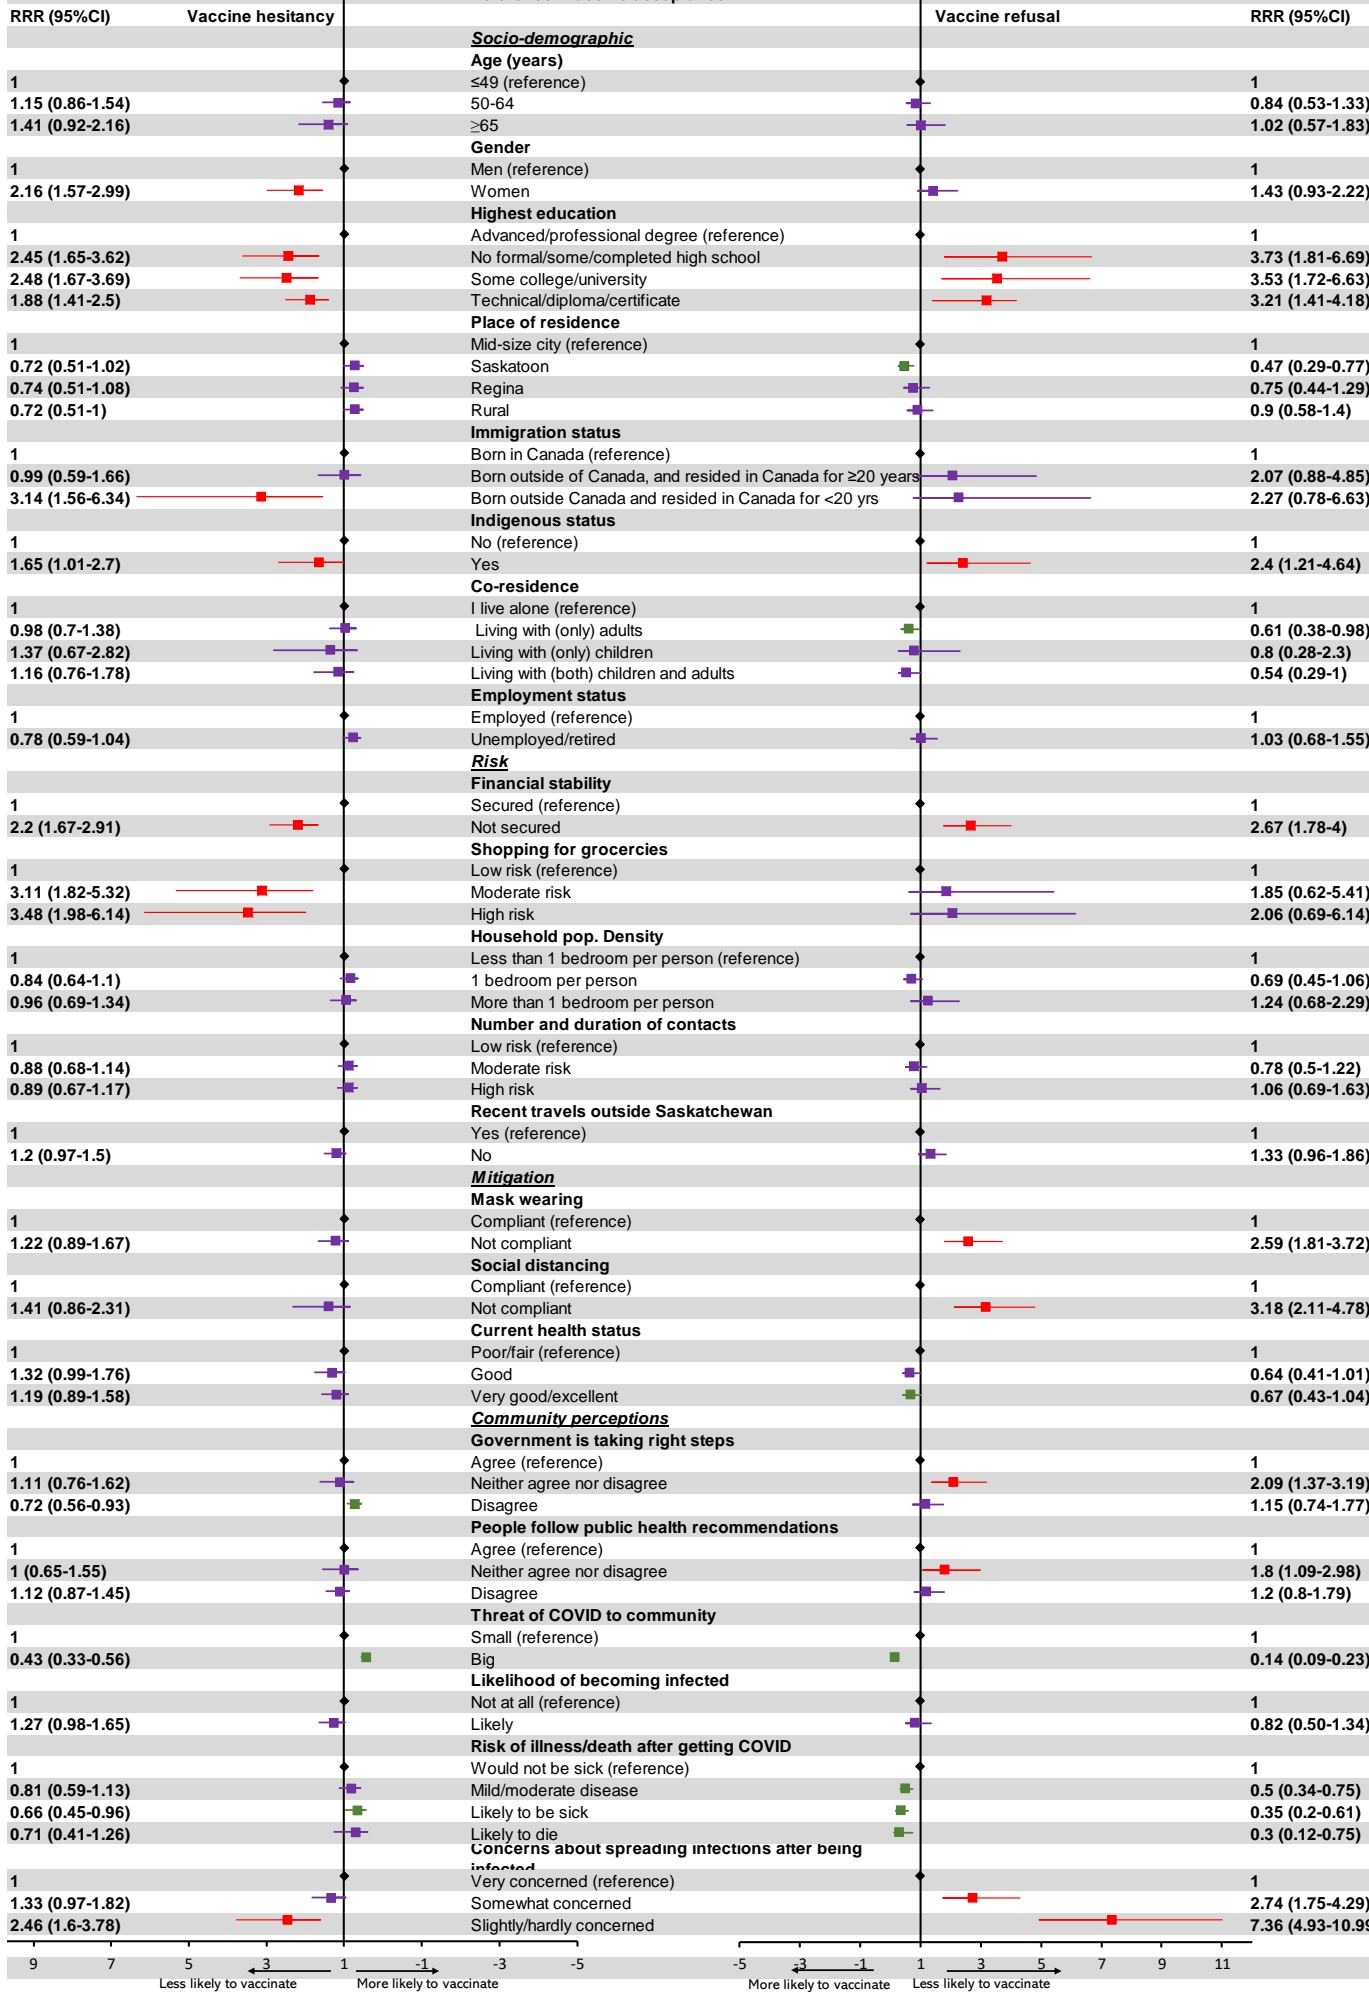

| All Rows            |           |           |       |
|---------------------|-----------|-----------|-------|
| Count               | G^2       | LogWorth  |       |
| 7317                | 10254.435 | 231.45465 |       |
| Level               | Rate      | Prob      | Count |
| 1. yes/already vacc | 0.7688    | 0.7688    | 5625  |
| 2. No               | 0.1095    | 0.1095    | 801   |
| 3. I don't know yet | 0.1218    | 0.1218    | 891   |

| Threat (small)      |           |          |       |
|---------------------|-----------|----------|-------|
| Count               | G^2       | LogWorth |       |
| 2341                | 4649.6368 | 100.5914 |       |
| Level               | Rate      | Prob     | Count |
| 1. yes/already vacc | 0.5548    | 0.5549   | 1299  |
| 2. No               | 0.2471    | 0.2470   | 578   |
| 3. I don't know yet | 0.1981    | 0.1981   | 464   |

| Threat (big)        |           |           |       |
|---------------------|-----------|-----------|-------|
| Count               | G^2       | LogWorth  |       |
| 4976                | 4691.2318 | 82.615917 |       |
| Level               | Rate      | Prob      | Count |
| 1. yes/already vacc | 0.8694    | 0.8694    | 4326  |
| 2. No               | 0.0447    | 0.0447    | 223   |
| 3. I don't know yet | 0.0858    | 0.0858    | 427   |

| Spreading COVID to others (very concerned) |          |          |       |
|--------------------------------------------|----------|----------|-------|
| Count                                      | G^2      | LogWorth |       |
| 1899                                       | 3446.839 |          |       |
| Level                                      | Rate     | Prob     | Count |
| 1. yes/already vacc                        | 0.6335   | 0.6335   | 1203  |
| 2. No                                      | 0.1574   | 0.1574   | 299   |
| 3. I don't know yet                        | 0.2091   | 0.2091   | 397   |

| Spreading COVID to others (hardly concerned) |           |          |       |
|----------------------------------------------|-----------|----------|-------|
| Count                                        | G^2       | LogWorth |       |
| 442                                          | 801.54181 |          |       |
| Level                                        | Rate      | Prob     | Count |
| 1. yes/already vacc                          | 0.2169    | 0.2181   | 96    |
| 2. No                                        | 0.6323    | 0.6311   | 280   |
| 3. I don't know yet                          | 0.1508    | 0.1508   | 67    |

| Mask wearing (all/most/some of the time) |           |           |       |
|------------------------------------------|-----------|-----------|-------|
| Count                                    | G^2       | LogWorth  |       |
| 1015                                     | 1012.6749 | 58.710347 |       |
| Level                                    | Rate      | Prob      | Count |
| 1. yes/already vacc                      | 0.8362    | 0.8361    | 849   |
| 2. No                                    | 0.1477    | 0.1476    | 150   |
| 3. I don't know yet                      | 0.0161    | 0.0162    | 16    |

| Mask wearing (little/none of the time) |           |           |       |
|----------------------------------------|-----------|-----------|-------|
| Count                                  | G^2       | LogWorth  |       |
| 3961                                   | 3347.7938 | 39.254291 |       |
| Level                                  | Rate      | Prob      | Count |
| 1. yes/already vacc                    | 0.8780    | 0.8779    | 3477  |
| 2. No                                  | 0.0183    | 0.0184    | 73    |
| 3. I don't know yet                    | 0.1037    | 0.1037    | 411   |

| Social distancing (all/most/some of the time) |           |          |       |
|-----------------------------------------------|-----------|----------|-------|
| Count                                         | G^2       | LogWorth |       |
| 957.3                                         | 769.95023 |          |       |
| Level                                         | Rate      | Prob     | Count |
| 1. yes/already vacc                           | 0.8864    | 0.8863   | 849   |
| 2. No                                         | 0.0965    | 0.0965   | 92    |
| 3. I don't know yet                           | 0.0171    | 0.0172   | 16    |

| Social distancing (little/none of the time) |           |          |       |
|---------------------------------------------|-----------|----------|-------|
| Count                                       | G^2       | LogWorth |       |
| 58.09                                       | 5.8259356 |          |       |
| Level                                       | Rate      | Prob     | Count |
| 1. yes/already vacc                         | 0.0087    | 0.0219   | 1     |
| 2. No                                       | 0.9913    | 0.9763   | 58    |
| 3. I don't know yet                         | 0.0000    | 0.0018   | 0     |

| Financial status (secured) |           |          |       |
|----------------------------|-----------|----------|-------|
| Count                      | G^2       | LogWorth |       |
| 3342                       | 2222.4689 |          |       |
| Level                      | Rate      | Prob     | Count |
| 1. yes/already vacc        | 0.9107    | 0.9107   | 3044  |
| 2. No                      | 0.0102    | 0.0102   | 34    |
| 3. I don't know yet        | 0.0791    | 0.0791   | 264   |

| Financial status (not stable) |           |          |       |
|-------------------------------|-----------|----------|-------|
| Count                         | G^2       | LogWorth |       |
| 618.8                         | 944.55213 |          |       |
| Level                         | Rate      | Prob     | Count |
| 1. yes/already vacc           | 0.7008    | 0.7010   | 434   |
| 2. No                         | 0.0623    | 0.0624   | 39    |
| 3. I don't know yet           | 0.2368    | 0.2366   | 147   |
